# Supplementary material
Source: PubMed Central journal article supplement (PMC3356618)
Supplement: 1120646109_pnas.1120646109_SI.pdf [file 1120646109_pnas.1120646109_SI.pdf]

# Supporting Information

Chong and Ham 10.1073/pnas.1120646109

## SI Text

**Molecular Dynamics (MD) Simulation Method and Calculation of Collision Cross-Section.** The dimerization simulations of 42-residue amyloid- $\beta$  (A $\beta$ 42) proteins were performed for 100 ns at 300 K and 1 bar under neutral pH with SANDER module of AMBER9 program package (1) using the ff99 force field (2). Each A $\beta$ 42 monomer has a sequence of <sup>(1)</sup>DAEFR HDSGY EVHHQ KLVFF AEDVG SNKGA IIGLM VGGVV IA<sup>(42)</sup>. Two monomers, each having the unfolded structure in water studied in ref. 3, were initially placed at 45 Å apart from each other with a random orientation, and no artificial attraction force was employed between them. Two monomers were explicitly solvated with 24,708 transferable intermolecular potential 3 point (TIP3P) water molecules (4) in the rectangular box with 20 Å buffer, and periodic boundary condition was applied. Six Na<sup>+</sup> counter ions were added to neutralize the system. The particle mesh Ewald method (5) was applied for treating long-range electrostatic interactions, whereas a 10 Å cutoff was used for the short-range nonbonded interactions. The hydrogen atoms were constrained to the equilibrium bond length using the SHAKE algorithm (6). To remove unfavorable van der Waals contacts, the system was initially subjected to 500 steps of steepest descent minimization followed by 500 steps of conjugate gradient minimization while each monomer was constrained by 500 kcal/(mol Å<sup>2</sup>) harmonic potential. Then, the whole system was minimized using 1,000 steps of steepest descent minimization followed by 1,500 steps of conjugate gradient minimization without harmonic restraints. The system was subsequently subjected to 20 ps equilibration process in which the temperature was gradually raised from 0 to 300 K. After the equilibration step, the production run was carried out for 100 ns with 2 fs time step and with *NPT* ensemble, i.e., a constant number of particles (*N*), pressure (*P*), and temperature (*T*). Temperature and pressure were controlled by Berendsen's thermostat and barostat with coupling constants of 1.0 and 2.0 ps, respectively (7). Three independent dimerization simulations were performed with different random initial relative orientations and velocities.

The A $\beta$ 42 dimerization process was monitored via the center-of-mass distance between two monomers, the number of intermonomer heavy atom contacts, and the collision cross-section. The heavy atom contact is counted when the distance between two heavy atoms belonging to different monomers is less than 5.4 Å. The collision cross-sections to be compared with the ion-mobility mass spectrometry measurements were calculated following the procedure described in refs. 8 and 9. To better correlate with the solvent-free experiments on samples electrosprayed from solution phase, protein structure from simulations was instantaneously dehydrated through energy minimization in vacuum (500,000 steps). The collision cross-section of the dehydrated structure was then calculated using the trajectory method implemented in the MOBCAL software (10).

**Structural Comparison with the Previous A $\beta$  Dimer Studies.** Up to now, related computational studies have been performed for the dimer formation of A $\beta$  fragments (11–13) and for the full-length A $\beta$ 42 dimerization in a continuum solvent (14, 15). We found a common structural feature—a salt-bridge formation between Glu11 in one monomer and Lys28 in the other—observed in the dimer formation of A $\beta$ (10–35) fragments (12). The presence of such a salt bridge was the characteristic feature of the A $\beta$ (10–35) dimer generated by a docking protocol that emphasizes the intermonomer electrostatic interaction, which, how-

ever, was found to have a short lifetime and did not contribute to the stability of this dimer (12). The intermonomer Glu11-Lys28 salt-bridge formation observed in our simulation was also quite transient and did not contribute to stabilize the A $\beta$ 42 dimer conformation as can be inferred from Fig. 6A in the main text. On the other hand, we did not observe further noteworthy common structural aspects with the previous studies, in particular, on the full-length A $\beta$ 42 dimer based on the discrete molecular dynamics simulations with a coarse-grained model for protein (14) and on the Monte Carlo simulations with implicit water and an effective potential for protein (15). This is possibly because of the differences in the solvation model and in the force fields employed in the simulations and of the intrinsically disordered nature of A $\beta$ 42 protein. In fact, the applicability of the force fields to intrinsically disordered proteins such as A $\beta$ 42 protein is one of the recent topics (16) because those proteins have not been designed to fold in a cooperative fashion, and hence, their structures are considered to be very susceptible to small differences in the force fields. The intrinsically disordered nature of A $\beta$ 42 protein has also made it difficult to determine its atomic-resolution structure by traditional methods such as X-ray crystallography and solution NMR. To the best of our knowledge, the collision cross-sections measured by the ion-mobility mass spectrometry (17) are the only structural characteristics of A $\beta$ 42 oligomers including dimers currently available from experiments. The agreement of the A $\beta$ 42 dimer structures from our simulations with the ion-mobility mass spectrometry measurement as discussed in the main text suggests the relevance of our simulations to experiment.

**Solvation Thermodynamics Based on the Integral-Equation Theory of Liquids.** For each A $\beta$ 42 dimer conformation generated by the MD simulations, we applied the three-dimensional reference interaction site model (3D-RISM) theory (18, 19) to calculate thermodynamic functions of solvation. The 3D-RISM theory is an integral-equation theory based on statistical mechanics for obtaining the 3D distribution function  $g_\gamma(\mathbf{r})$  of the site  $\gamma$ , oxygen or hydrogen, of water at position  $\mathbf{r}$  around a molecular solute such as protein. For a solute-solvent system at infinite dilution, the 3D-RISM equation is given by

$$h_\gamma(\mathbf{r}) = \sum_{\gamma'} c_{\gamma'}(\mathbf{r}) * [w_{\gamma'\gamma}^{vv}(\mathbf{r}) + \rho h_{\gamma'\gamma}^{vv}(\mathbf{r})]. \quad [\text{S1}]$$

Here  $h_\gamma(\mathbf{r})$  and  $c_\gamma(\mathbf{r})$  refer to the 3D total and direct correlation functions of the water site  $\gamma$ , respectively; the asterisk denotes a convolution integral;  $w_{\gamma'\gamma}^{vv}(\mathbf{r})$  and  $h_{\gamma'\gamma}^{vv}(\mathbf{r})$  are the site-site intramolecular and total correlation functions of water; and  $\rho$  represents the average number density of water. This equation is to be supplemented by an approximate closure relation, and in the present study we adopted the one suggested by Kovalenko and Hirata (18)

$$h_\gamma(\mathbf{r}) = \begin{cases} \exp[d_\gamma(\mathbf{r})] - 1 & \text{for } d_\gamma(\mathbf{r}) \leq 0, \\ d_\gamma(\mathbf{r}) & \text{for } d_\gamma(\mathbf{r}) > 0, \end{cases} \quad [\text{S2}]$$

in which  $d_\gamma(\mathbf{r}) = -u_\gamma(\mathbf{r})/(k_B T) + h_\gamma(\mathbf{r}) - c_\gamma(\mathbf{r})$  with  $k_B$  denoting Boltzmann's constant.  $u_\gamma(\mathbf{r})$  refers to the interaction potential acting on the water site  $\gamma$  that is generated by atoms in protein and is represented by a sum of radially symmetric Lennard-Jones (LJ) and Coulomb electrostatic terms centered on the protein interaction site  $\alpha$  of position  $\mathbf{r}_\alpha$ ,  $u_\gamma(\mathbf{r}) = \sum_\alpha [u_{\alpha\gamma}^{(\text{LJ})}(|\mathbf{r} - \mathbf{r}_\alpha|) + u_{\alpha\gamma}^{(\text{elec})}(|\mathbf{r} - \mathbf{r}_\alpha|)]$ . Here  $u_{\alpha\gamma}^{(\text{LJ})}(r) = 4\epsilon_{\alpha\gamma}[(\sigma_{\alpha\gamma}/r)^{12} - (\sigma_{\alpha\gamma}/r)^6]$  and

$u_{\alpha\gamma}^{(\text{elec})}(r) = q_\alpha q_\gamma / r$  with  $\epsilon_{\alpha\gamma}$ ,  $\sigma_{\alpha\gamma}$ ,  $q_\alpha$ , and  $q_\gamma$  being the LJ parameters and atomic charges.

The 3D-RISM calculation for  $g_\gamma(\mathbf{r})$  was performed as follows. For each A $\beta$ 42 dimer conformation generated by MD simulations, one can determine the interaction potential  $u_\gamma(\mathbf{r})$ . Based on the knowledge of  $u_\gamma(\mathbf{r})$ , the two unknown functions  $h_\gamma(\mathbf{r})$  and  $c_\gamma(\mathbf{r})$  can be determined by solving Eqs. S1 and S2 self-consistently, and the 3D water distribution function is obtained via  $g_\gamma(\mathbf{r}) = h_\gamma(\mathbf{r}) + 1$ . We used the dielectrically consistent RISM theory (20) for the site–site correlation functions  $w_{\gamma\gamma}^{vv}(r)$  and  $h_{\gamma\gamma}^{vv}(r)$  of water determined at  $T = 300$  K and  $\rho = 1$  g/cm<sup>3</sup> and with the dielectric constant of 78.4. Technical details concerning the 3D-RISM calculation can be found in ref. 18.

Thermodynamic functions of solvation can be obtained based on the water distribution function. For the solvation free energy  $\Delta\mu$ , the following analytical expression is available under the use of the Kovalenko–Hirata closure given in Eq. S2 (18):

$$\Delta\mu = \rho k_B T \sum_\gamma \int d\mathbf{r} \left[ \frac{1}{2} h_\gamma(\mathbf{r})^2 \Theta(-h_\gamma(\mathbf{r})) - c_\gamma(\mathbf{r}) - \frac{1}{2} h_\gamma(\mathbf{r}) c_\gamma(\mathbf{r}) \right]. \quad [\text{S3}]$$

Here  $\Theta(x)$  is the Heaviside step function.

Although the solvation free energy does not depend on whether the solute insertion is done under the isochoric (constant volume) or isobaric (constant pressure) condition, its energetic and entropic components depend on such a condition (21). Under the isochoric condition, the solvation free energy  $\Delta\mu$  comprises the solvation energy  $\Delta\epsilon_V$  and isochoric solvation entropy  $\Delta s_V$ . The latter is given by the temperature derivative of  $\Delta\mu$  at constant density,

$$\Delta s_V = - \left( \frac{\partial \Delta\mu}{\partial T} \right)_\rho. \quad [\text{S4}]$$

In the present work, the temperature derivative was calculated numerically using the first order finite difference with  $\Delta T = 2$  K. The solvation energy can then be obtained from

$$\Delta\epsilon_V = \Delta\mu + T\Delta s_V. \quad [\text{S5}]$$

Under the isobaric condition, which is more relevant to the present study because the MD simulations were performed at constant pressure, the solvation free energy consists of the solvation enthalpy  $\Delta h$  and isobaric solvation entropy  $\Delta s$ . The relations between the quantities under isochoric and isobaric conditions are given by (21)

$$\Delta h = \Delta\epsilon_V + \frac{T\alpha_P}{\kappa_T} V_u, \quad T\Delta s = T\Delta s_V + \frac{T\alpha_P}{\kappa_T} V_u \quad [\text{S6}]$$

in terms of the isobaric thermal expansion coefficient  $\alpha_P$  and the isothermal compressibility  $\kappa_T$  of the solvent, and the partial molar volume  $V_u$  of the solute.

Using the experimental values for  $\alpha_P$  and  $\kappa_T$  for water at  $T = 300$  K and  $P = 1$  bar, the term  $T(\alpha_P/\kappa_T)V_u$  in Eq. S6 can be estimated as  $0.041 \times V_u$  kcal/mol when  $V_u$  is measured in cm<sup>3</sup>/mol. The partial molar volume can be obtained in terms of the 3D direct correlation function via  $V_u = k_B T \kappa_T [1 - \rho \sum_\gamma \int d\mathbf{r} c_\gamma(\mathbf{r})]$  (22). We confirmed that the contribution from the term  $T(\alpha_P/\kappa_T)V_u$  is practically negligible as far as the changes in  $\Delta h$  vs.  $\Delta\epsilon_V$  and  $T\Delta s$  vs.  $T\Delta s_V$  are concerned.

The main limitation of the 3D-RISM theory lies in the use of an approximate closure relation such as Eq. S2, which is inherent in all the integral-equation theories. In particular, the absolute value of the solvation free energy depends on the closure relation

used (18, 19). However, it is known that relative values of the solvation free energies are reasonably accurate (18). We note in this connection that only relative values of thermodynamic functions matter in the present study. It is therefore expected that our results in the main text do not significantly suffer from the limitation of the integral-equation theory.

### Decomposition Method of the Solvation Thermodynamic Functions.

The nonelectrostatic and electrostatic contributions to the solvation free energy  $\Delta\mu$ , solvation enthalpy  $\Delta h$ , and solvation entropy  $\Delta s$  can be obtained as follows. First, we calculate  $\Delta\mu$ ,  $\Delta h$ , and  $\Delta s$  with the full protein–water interaction. Next, we repeat this calculation with the electrostatic protein–water interaction turned off,  $u_{\alpha\gamma}^{(\text{elec})}(r) = 0$ , which yields the nonelectrostatic contributions to be denoted as  $\Delta\mu^{(\text{LJ})}$ ,  $\Delta h^{(\text{LJ})}$ , and  $\Delta s^{(\text{LJ})}$ . The electrostatic contributions can then be obtained by subtraction:  $\Delta\mu^{(\text{elec})} = \Delta\mu - \Delta\mu^{(\text{LJ})}$ ,  $\Delta h^{(\text{elec})} = \Delta h - \Delta h^{(\text{LJ})}$ , and  $\Delta s^{(\text{elec})} = \Delta s - \Delta s^{(\text{LJ})}$ .

Further decomposition of the solvation thermodynamic quantities into atomic contributions can be carried out using the exact partitioning method developed in ref. 23 that is based on the Kirkwood charging formula. The atomic decomposition of the solvation free energy  $\Delta\mu$  into contribution  $\Delta\mu_\alpha$  from atom  $\alpha$  in protein is given by

$$\Delta\mu = \sum_\alpha \Delta\mu_\alpha \quad \text{with} \quad \Delta\mu_\alpha = \Delta\mu_\alpha^{(\text{LJ})} + \Delta\mu_\alpha^{(\text{elec})}, \quad [\text{S7}]$$

in which

$$\Delta\mu_\alpha^{(\text{LJ})} = 4\pi\rho \sum_\gamma \int_0^1 d\lambda_1 \int r^2 dr \frac{\partial u_{\alpha\gamma}^{(\text{LJ})}(r; \lambda_1)}{\partial \lambda_1} g_{\alpha\gamma}(r; \lambda_1, \lambda_2 = 0), \quad [\text{S8}]$$

$$\Delta\mu_\alpha^{(\text{elec})} = 4\pi\rho \sum_\gamma \int_0^1 d\lambda_2 \int r^2 dr \frac{\partial u_{\alpha\gamma}^{(\text{elec})}(r; \lambda_2)}{\partial \lambda_2} g_{\alpha\gamma}(r; \lambda_1 = 1, \lambda_2). \quad [\text{S9}]$$

Here,  $\lambda_1$  and  $\lambda_2$  are the parameters for scaling the LJ parameter ( $\lambda_1 \sigma_{\alpha\gamma}$ ) and the atomic charge ( $\lambda_2 q_\alpha$ ) of the protein, respectively, and the resulting interaction potentials are denoted as  $u_{\alpha\gamma}^{(\text{LJ})}(r; \lambda_1)$  and  $u_{\alpha\gamma}^{(\text{elec})}(r; \lambda_2)$ .  $g_{\alpha\gamma}(r; \lambda_1, \lambda_2)$  refers to the radial distribution function, related to the 3D distribution function via  $g_{\alpha\gamma}(r; \lambda_1, \lambda_2) = (1/4\pi) \int d\hat{\mathbf{r}} g_\gamma(\mathbf{r}_\alpha + \mathbf{r}; \lambda_1, \lambda_2)$  with  $\hat{\mathbf{r}} = \mathbf{r}/r$  and  $r = |\mathbf{r}|$ , when the protein–water interaction potential is given by  $u_\gamma(\mathbf{r}; \lambda_1, \lambda_2) = \sum_\alpha [u_{\alpha\gamma}^{(\text{LJ})}(|\mathbf{r} - \mathbf{r}_\alpha|; \lambda_1) + u_{\alpha\gamma}^{(\text{elec})}(|\mathbf{r} - \mathbf{r}_\alpha|; \lambda_2)]$ .  $g_{\alpha\gamma}(r; \lambda_1, \lambda_2)$  can also be obtained from the 3D-RISM theory with the aforementioned procedure. We used the Kovalenko–Hirata closure for this purpose as well, in which case both Eqs. S7–S9 and the analytical expression (S3) yield the identical numerical value of the total solvation free energy  $\Delta\mu$ .

A corresponding partitioning of the isochoric solvation entropy  $\Delta s_V$  can be derived by applying the thermodynamic relation (S4) to Eq. S7. The decomposition of the solvation energy  $\Delta\epsilon_V$  is then obtained using Eq. S5 for each atomic component.

As mentioned above, isochoric ( $\Delta\epsilon_V$  and  $T\Delta s_V$ ) and isobaric ( $\Delta h$  and  $T\Delta s$ ) quantities behave practically the same as far as their changes are concerned. Therefore, the changes in the atomic decomposition of  $\Delta h$  and  $T\Delta s$  can be well approximated by those of  $\Delta\epsilon_V$  and  $T\Delta s_V$ , and this approximation was used in the main text.

1. Case DA, et al. (2006) *AMBER9* (University of California, San Francisco).
